# Supplementary material for: Enhanced permittivity and multi-region microwave absorption of nanoneedle-like ZnO in the X-band at elevated temperature
Source: Royal Society of Chemistry journal article supplement (doi:10.1039/c5tc00426h), 2015-01-01
Supplement: c5tc00426h1.pdf [file c5tc00426h1.pdf]

## Supporting Information

### **Enhanced permittivity and multi-region microwave absorption of nanoneedle-like ZnO in X-band at elevated temperature**

Jia Liu,<sup>a</sup> Wen-Qiang Cao<sup>b</sup>, Hai-Bo Jin,<sup>a</sup> Jie Yuan,<sup>\*b</sup> De-Qing Zhang<sup>\*a</sup> and Mao-Sheng Cao<sup>\*a</sup>

<sup>a</sup>School of Material Science and Engineering, Beijing Institute of Technology, Beijing 100081, China. E-mail: caomaosheng@bit.edu.cn; zhdqing@163.com

<sup>b</sup>School of Information Engineering, Minzu University of China, Beijing 100081, China. E-mail: yuanjie4000@sina.com

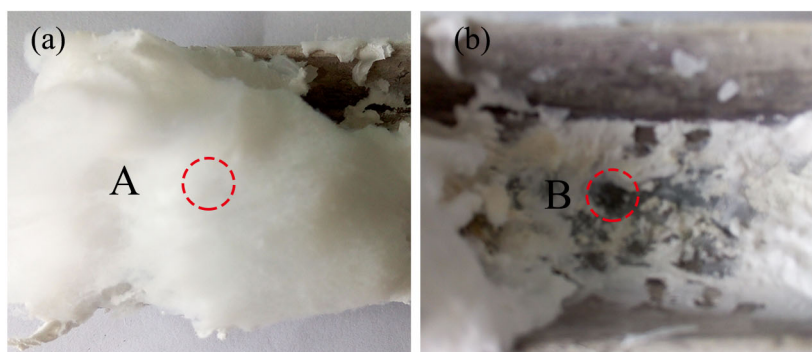

Fig.S1 The photographs of the samples in the (a) top and (b) bottom of the quartz boat.

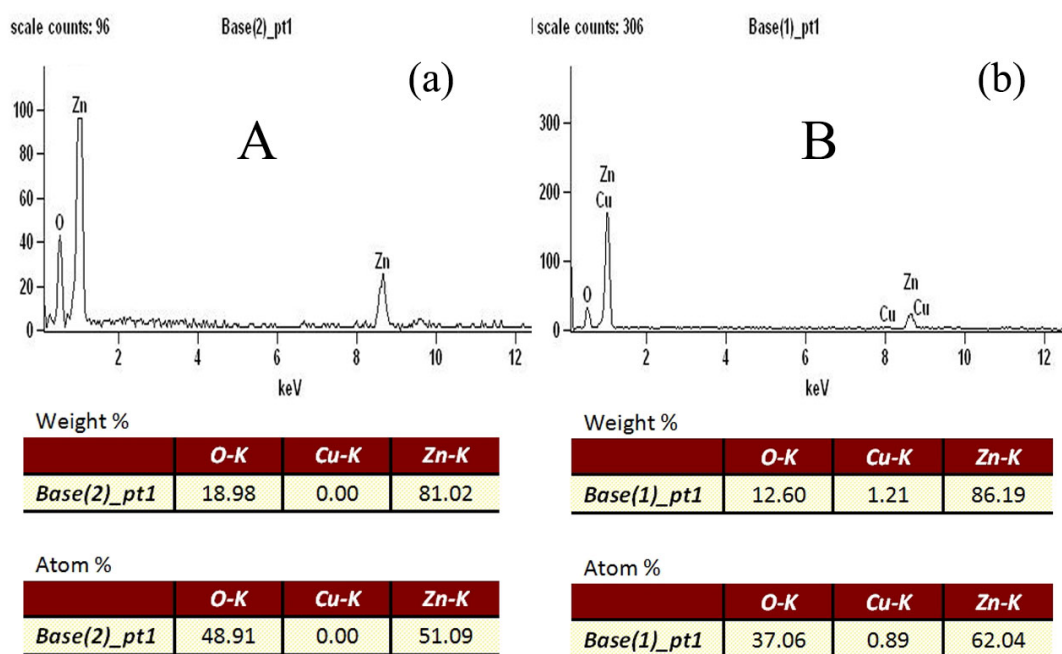

Fig.S2 The EDS patterns and data of the samples A and B in Fig.S1.

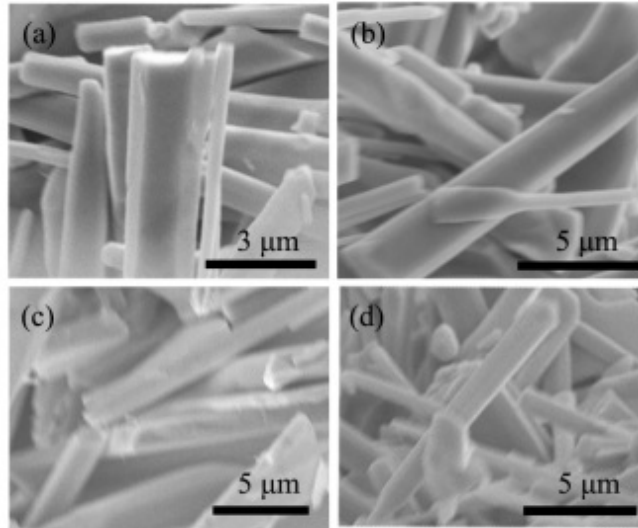

Fig.S3 The cross sectional SEM images of the pressed ZnO<sub>n</sub> sample.

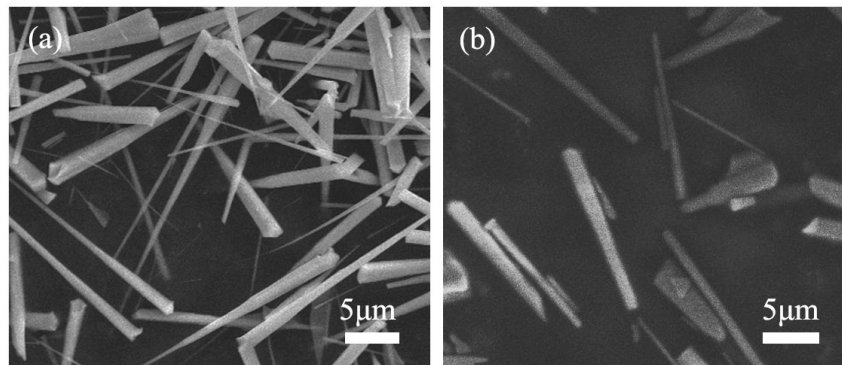

Fig.S4 The SEM images of the ZnO<sub>n</sub> powder (a) before and (b) after resintering and dielectric measurement.
